# Supplementary material
Source: PubMed Central journal article supplement (PMC2650333)
Supplement: 0809008106_0809008106SI.pdf [file 0809008106_0809008106SI.pdf]

# Supporting Information

Bolitho et al. 10.1073/pnas.0809008106

## SI Methods

**Genetic Screening of Mice.** DNA was extracted from the tails of 10- to 21-day-old litters of gene-targeted and transgenic mice using the Puregene DNA Purification Kit (Flowgen Bioscience Limited) according to the manufacturer's instructions. Genetic status of the *Mlh1* alleles was detected by the presence of 450-bp and/or 350-bp PCR products for the targeted allele and WT allele, respectively, at an annealing temperature of 58 °C. The  $E\mu$ -*v-Abl* transgene was detected via the presence of a 381-bp PCR product using an annealing temperature of 58 °C. The presence of the *vavP-bcl2* transgene was confirmed by detection of a 200-bp PCR product at an annealing temperature of 58 °C. Presence of the  $E\mu$ -*myc* transgene was confirmed by the presence of an 830-bp PCR product using an annealing temperature of 55 °C. The sequences of the primers used for *Mlh* knockout allele detection were (5'→3'): TGCAATAGGCTGCCTAGG and (5'→3'): TGGAAGGATTGGAGCTACGG. The sequences of the primers used for *Mlh* WT allele detection were (5'→3'): TTTTCAGTGCAGCCTATGCTC and (5'→3'): TGGAAGGATTGGAGCTACGG. Synthetic oligonucleotide sequences for detection of the *v-Abl* transgene were (5'→3'): GGAAGTATGATGGGAGCAGTGG and (5'→3'): GCA-GACACTCTATGCCTGTGTGG. The primer sequences to detect the *vavP-bcl2* transgene were (5'→3'): GCCGCAGACATGATAAGATACATTGATG and (5'→3'): AAAACCTCCACACCTCCCCCTGAA. The  $E\mu$ -*myc* transgene was detected using the following primers (5'→3'): CAGCTGGCGTAATAGCGAAGAG and (5'→3'): CTGTGACTGGTGAGTACTCAACC. Primer sequences to ensure integrity of these 3 PCR reactions were (5'→3'): GATGTGCTCCAGGCTA-AAGTT and (5'→3'): AGAAACGGAATGTTGTGGAGT, which generated a PCR product of 500 bp.

**Flow Cytometry.** To determine the cell surface phenotype of tumors, tissue (either splenocytes or ascites cells) were harvested after passage through C57BL/6 RAG-1<sup>-/-</sup> mice to obtain normal lymphocyte-free tumor populations. Single-cell suspensions were made and erythrocytes were removed using ACK lysis buffer (155 mM ammonium chloride, 10 mM potassium hydrogen carbonate, 0.1 mM EDTA, pH 7.4). One million to 2 million cells were stained for 20 min on ice in FACS buffer (0.5% wt/vol

BSA, 0.04% vol/vol sodium azide in PBS) with the following reagents: anti-CD8-FITC (53-6.7), anti-CD19-FITC (1D3), anti-CD86-FITC (GL1), anti-T-cell receptor (TCR)  $\gamma\delta$ -FITC (GL3), anti-CD22.2-FITC (Cy34.1), anti-CD4-PE (GK1.5), anti-CD40-PE (3/23), anti-B220-PE (RA3-6B2), anti-NK1.1-PE (PK136), anti-CD138-PE (281-2), anti-IgD-PE (11-26), goat F(ab)<sub>2</sub> anti-mouse IgG-PE (catalog no. M35004-1; Caltag Laboratories), sheep polyclonal anti-mouse Ig-PE (catalog no. AQ326H; Chemicon Australia), anti-TCR $\beta$ -allophycocyanin (APC) (H57-597), anti-B220-APC (RA3-6B2), anti-CD93-APC (AA4.1), IgM-biotin (R6-60.2), anti-H2-K<sup>b</sup>-biotin (AF6-88.5), anti-H2-D<sup>b</sup>-biotin (28-14-8), anti-I-A<sup>b</sup>-biotin (KH74), anti-CD80-biotin (16-10A1), or anti-CD70-biotin (FR70). Nonspecific binding was blocked by the inclusion of anti-Fc receptor (2.4G2) mAb in each mixture. Cells were then washed twice in FACS buffer and stained with 0.2  $\mu$ g/mL streptavidin-APC (catalog no. 17-4314-82; eBioscience) on ice for 20 min when appropriate. Following a final wash in FACS buffer, the cells were resuspended in 300  $\mu$ L of FACS buffer with 0.67  $\mu$ M hydroxystilbamidine methanesulfonate (Fluoro-gold; Invitrogen) viability dye and analyzed on a BD LSR II (BD Biosciences). Antibody isotypes produced by *v-Abl*<sup>+</sup> plasmacytomas were determined by cytometric bead array (Mouse Ig Isotyping Kit, catalog no. 550026; BD Biosciences) as described in the manufacturer's instructions. Briefly, each plasmacytoma line was passaged through a C57BL/6 RAG-1<sup>-/-</sup> mouse. Ascites fluid was harvested from tumor-bearing mice and diluted 1:1,000. Samples and appropriate controls and standards were incubated with mouse Ig capture beads for 15 min at room temperature. Anti-mouse kappa light chain-PE and anti-mouse lambda light chain-FITC detector antibodies were then added to each sample for 15 min in the dark. All samples were then washed, resuspended in buffer, and analyzed on a BD LSR II.

**Statistical Analysis.** Kaplan-Meier survival curves were generated using MedCalc version 8.1 software. A log-rank test was used to compare survival curves and to determine *P* values. Disease incidence was compared among each strain using a Fisher's exact test. A *P* value of less than 0.05 was considered statistically significant. Average lifespans of animals that succumbed to disease are presented in the text as mean  $\pm$  SEM.

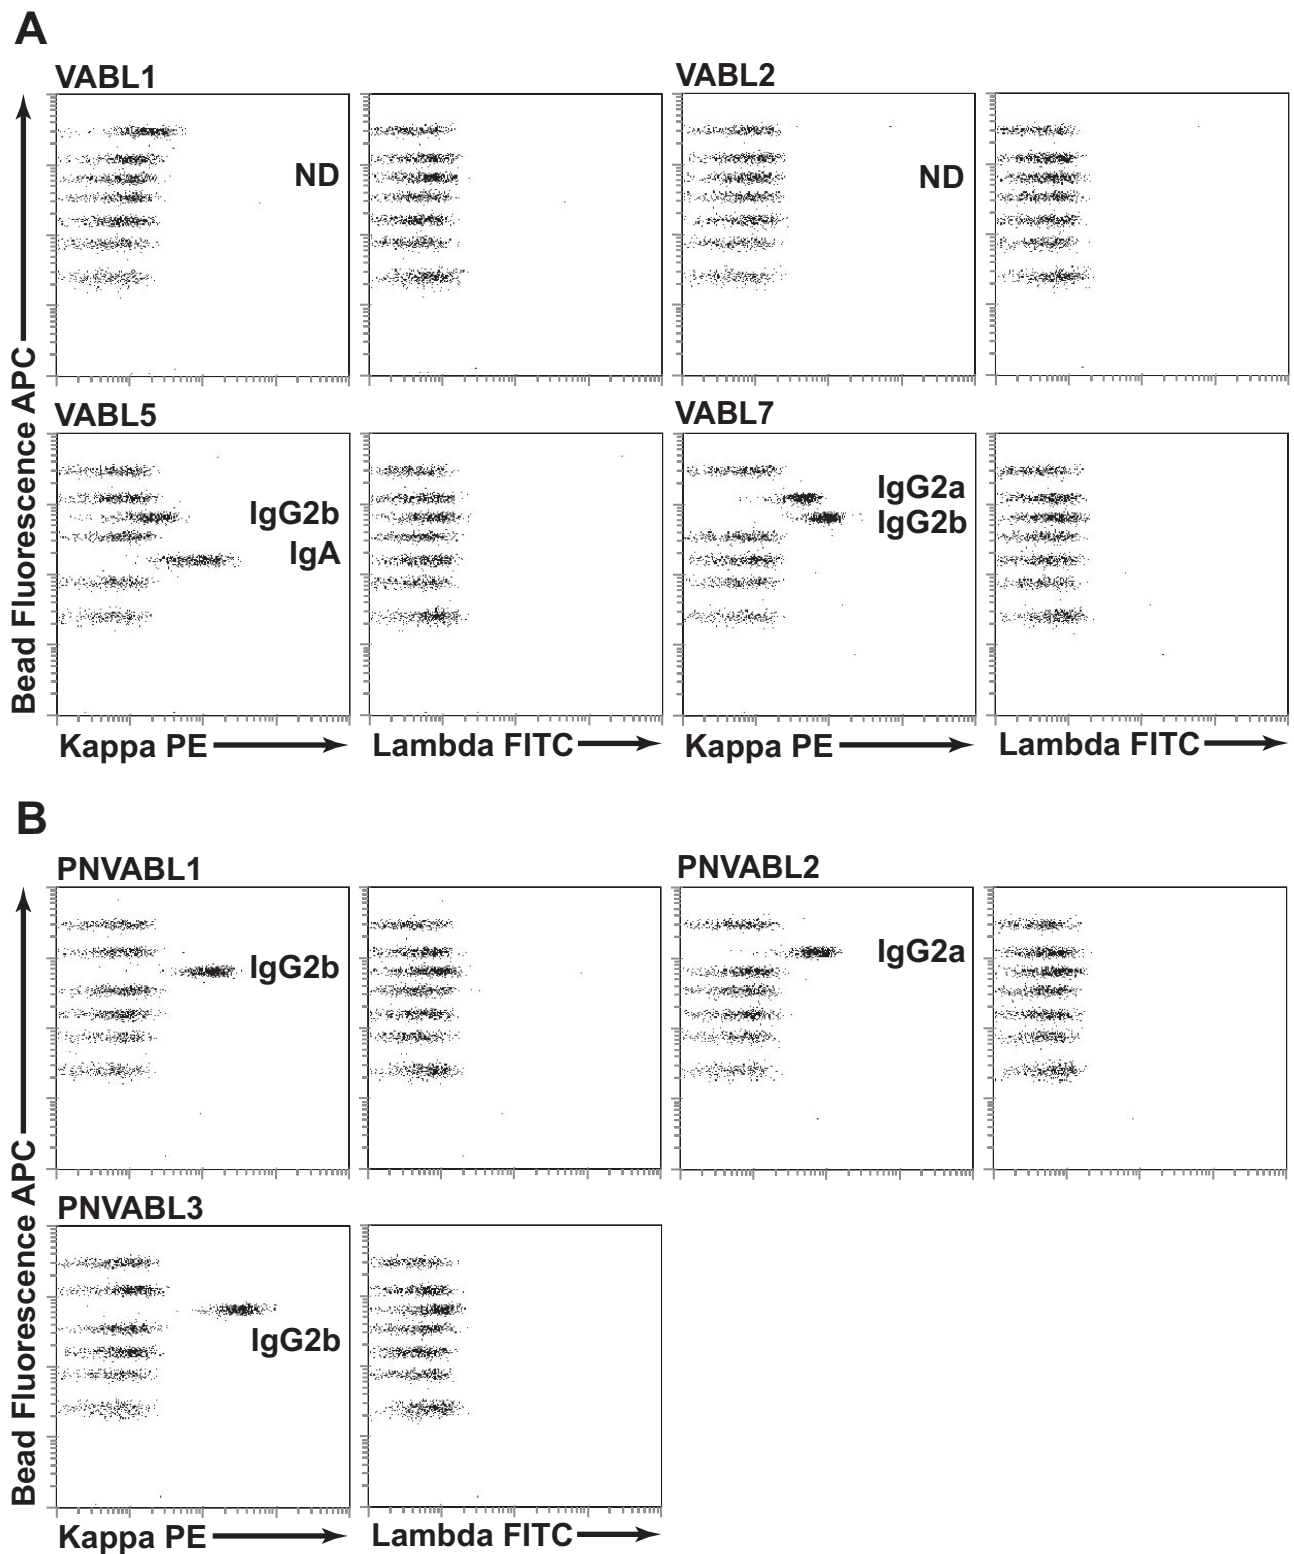

**Fig. 51.**  $v\text{-Abl}^+ \text{pfp}^{+/+}$  and  $v\text{-Abl}^+ \text{pfp}^{-/-}$  plasmacytomas produce IgG and/or IgA antibodies. Ig isotypes were determined by cytometric bead array (CBA) analysis of ascites from  $\text{RAG1}^{-/-}$  mice after transplantation with various  $v\text{-Abl}^+ \text{pfp}^{+/+}$  (A) and  $v\text{-Abl}^+ \text{pfp}^{-/-}$  (B) plasmacytomas. Heavy chain isotypes are represented by bead clusters with decreasing APC fluorescence intensity in the following order: IgG1, IgG2a, IgG2b, IgG3, IgA, IgM, and IgE. Light chain (kappa or lambda) type was determined by additional PE or FITC fluorescence. Text represents the isotype(s) secreted by each plasmacytoma. ND, not determined.



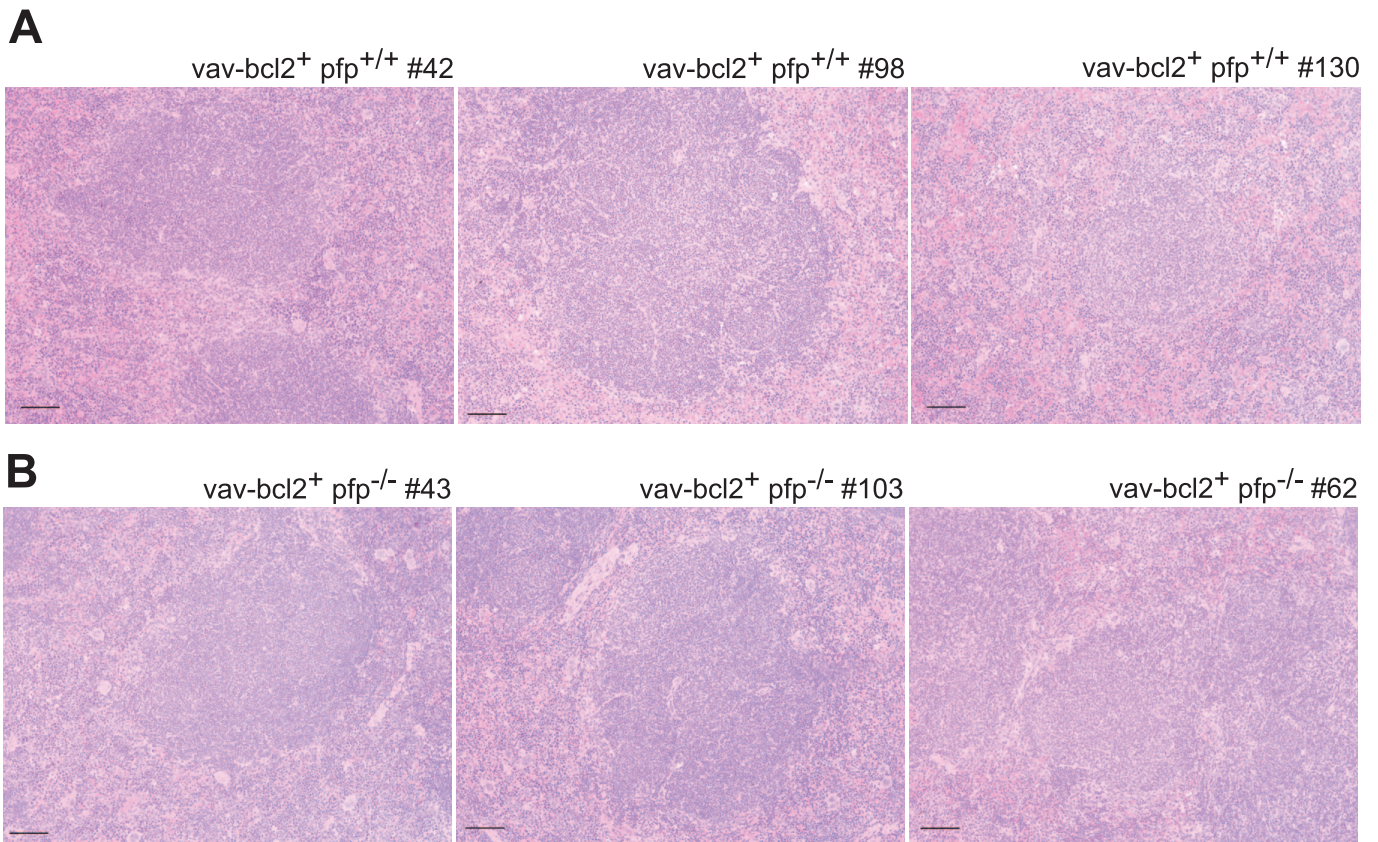

**Fig. S3.** Vav-bcl2<sup>+</sup> pfp<sup>+/+</sup> and vav-bcl2<sup>+</sup> pfp<sup>-/-</sup> mice develop follicular lymphoma. H&E-stained sections of formalin-fixed spleens from moribund vav-bcl2<sup>+</sup> pfp<sup>+/+</sup> (A) and vav-bcl2<sup>+</sup> pfp<sup>-/-</sup> (B) mice showing follicular lymphoma in each instance. Three representative spleens from both groups are shown. (Scale bar: 100  $\mu$ m.)
